# Supplementary material for: Regulation of ethylene-responsive SlWRKYs involved in color change during tomato fruit ripening
Source: PubMed Central journal article supplement (PMC5709409; doi:10.1038/s41598-017-16851-y), 2017-11-30
Supplement: 41598_2017_16851_MOESM1_ESM.pdf [file 41598_2017_16851_MOESM1_ESM.pdf]

## Supplementary Information

### Regulation of ethylene-responsive *SIWRKYs* involved in color change during tomato fruit ripening

Ling Wang<sup>1,2,4†</sup>, Xue-lian Zhang<sup>1,3,†</sup>, Lu Wang<sup>1,2,4</sup>, Yanan Tian<sup>1,3</sup>, Ning Jia<sup>1,2,4</sup>, Shuzhen Chen<sup>1,3</sup>, Ning-bo Shi<sup>1,2,4</sup>, Xuemei Huang<sup>1,2,4</sup>, Chu Zhou<sup>1,3</sup>, Yaowen Yu<sup>1,2,4</sup>, Zhao-qi Zhang<sup>1,2,4\*</sup>, Xue-qun Pang<sup>1,3,4\*</sup>

<sup>1</sup> State Key Laboratory for Conservation and Utilization of Subtropical Agro-bioresources, South China Agricultural University, Guangzhou, 510642, China; <sup>2</sup> College of Horticulture, South China Agricultural University, Guangzhou, 510642, China; <sup>3</sup> College of Life Sciences, South China Agricultural University, Guangzhou, 510642, China; <sup>4</sup> Guangdong Provincial Key Laboratory of Postharvest Science of Fruits and Vegetables, Guangzhou 510642, China

\*Authors for Correspondence:

Xue-qun Pang, e-mail: xqpang@scau.edu.cn

Zhao-qi Zhang, e-mail: zqzhang@scau.edu.cn

† These authors contributed equally to the paper.

**Running Title:** Regulation of SIER-WRKYs during tomato color chang

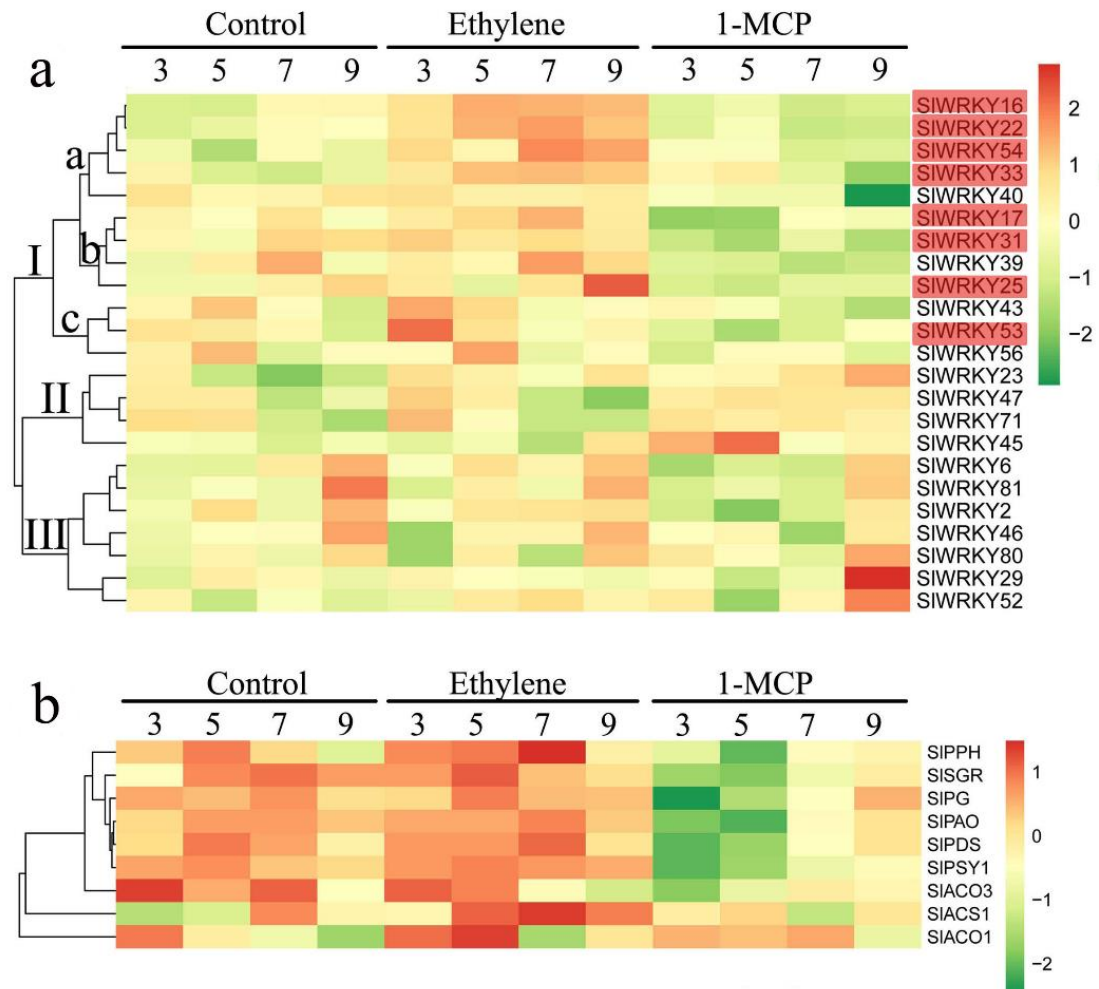

**Supplementary Figure 1.** Hierarchical cluster of transcript levels for color change related genes and the selected *SIWRKY*s during tomato fruit ripening in response to ethylene and 1-MCP. The complete linkage hierarchical clustering of these genes were performed by heatmap according to the ClustVis program available at <http://biit.cs.ut.ee/clustvis/>. The cluster was generated using the distance of the coefficient correlation of gene expression values by Pearson clustering algorithm method. (a) Hierarchical cluster of transcript levels for the 23 selected *SIWRKY* genes. (b) Hierarchical cluster of transcript levels for 5 color changerelated genes with the reference of 3 ethylene biosynthesis genes (*ACS1*, *ACO1* and *ACO3*) and a cell wall metabolism gene (*PG*). Red and green boxes respectively indicate higher and lower levels of expression compared to the levels before the treatments at day 0. The color density is directly proportional to the expression levels. The transcript levels were detected by Real-time RT-PCR in the samples collected from the control, ethylene or 1-MCP treated fruits at the indicated time points as described in Fig. 2. The labels for 8 ethylene responsive *SIWRKY*s in cluster I and selected for further analysis were highlighted in red.

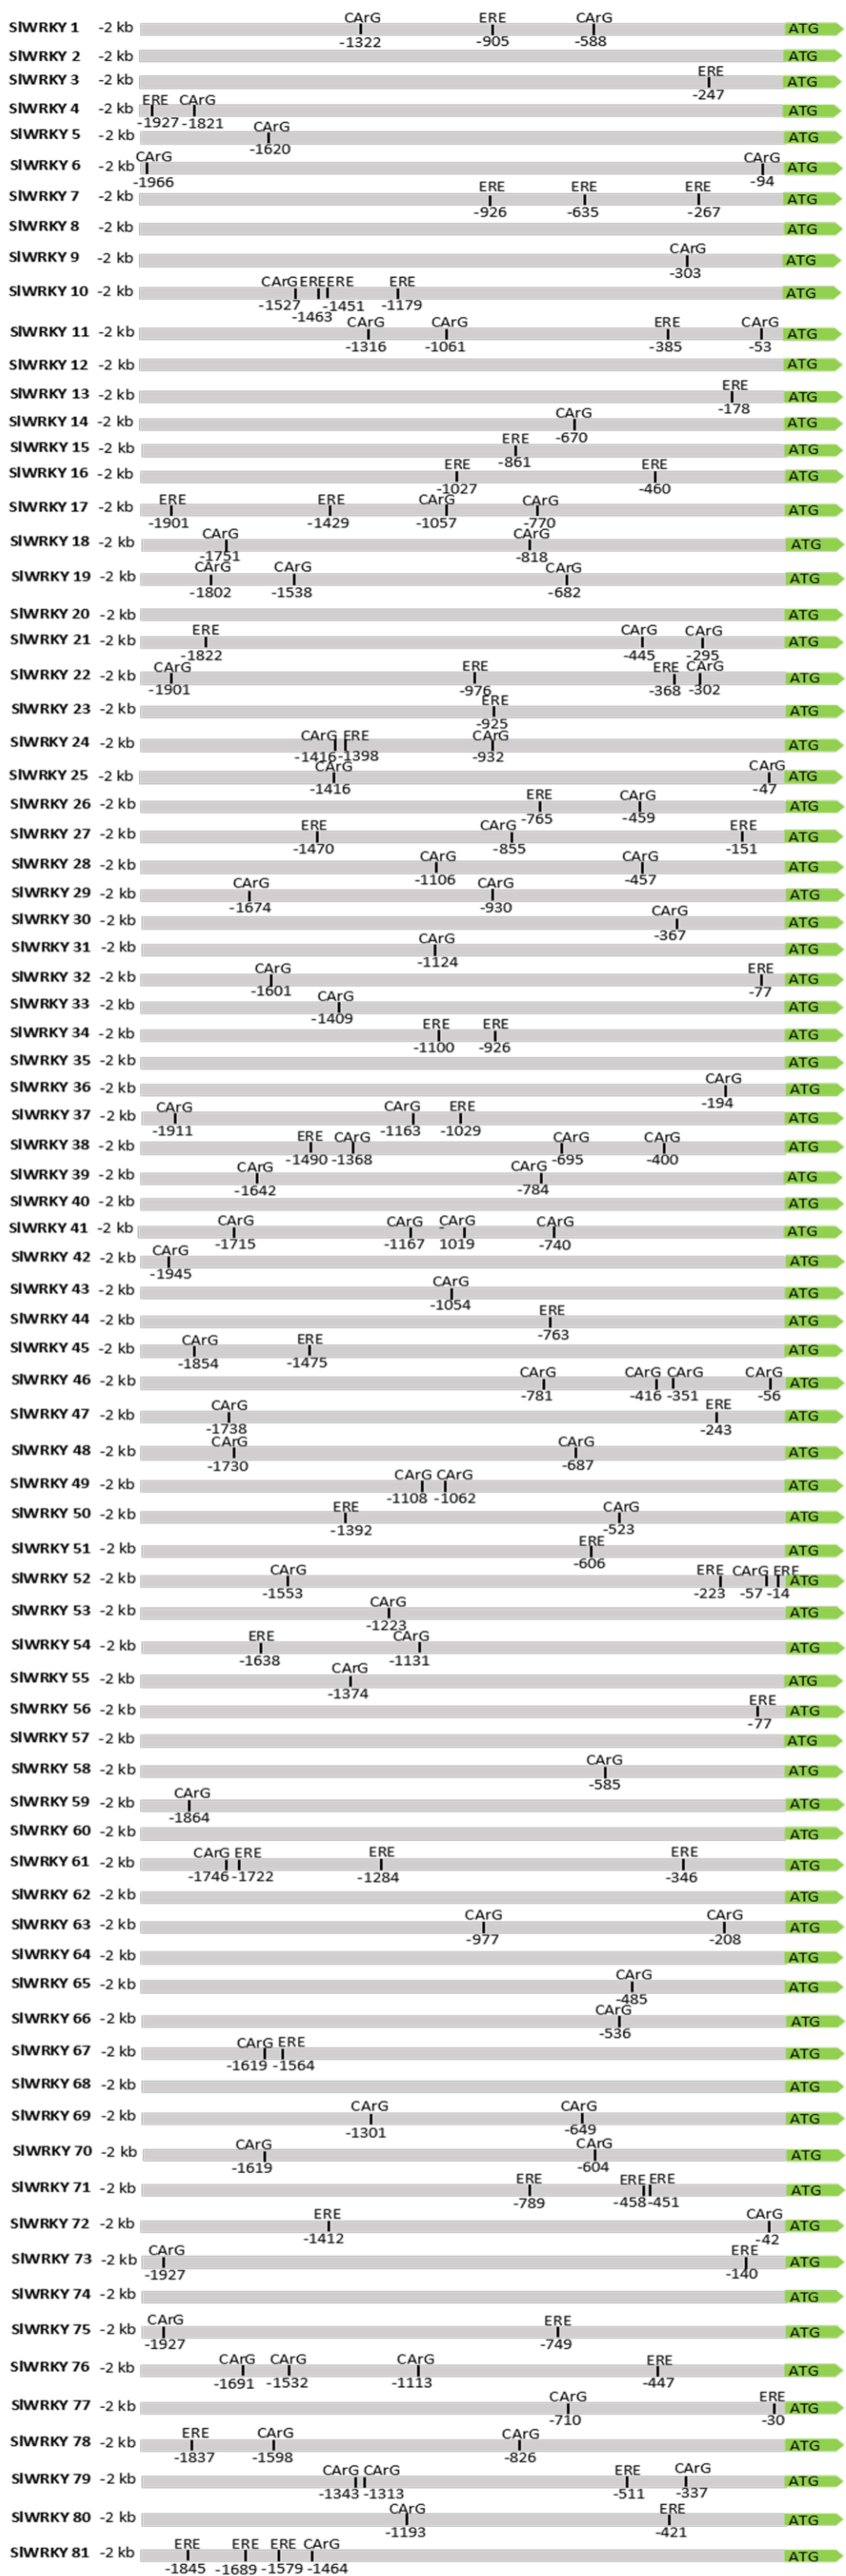

**Supplementary Figure 2.** The ethylene-response elements (ERE) and RIN-binding sites (known as CArG box) promoter regions of 81 SIWRKY genes. The conserved cis-regulatory elements of ERE and CArG were predicted at <http://bioinformatics.psb.ugent.be/webtools/plantcare/html/>). Accordingly, among selected 23 SIWRKY genes, *SIWRKY16, 17, 22, 23, 45, 47, 52, 54, 71, 80, and 81* existed ethylene-response elements, *SIWRKY6, 17, 22, 25, 29, 31, 33, 39, 45, 46, 47, 52, 53, 54, 80, and 81* existed CArG box.

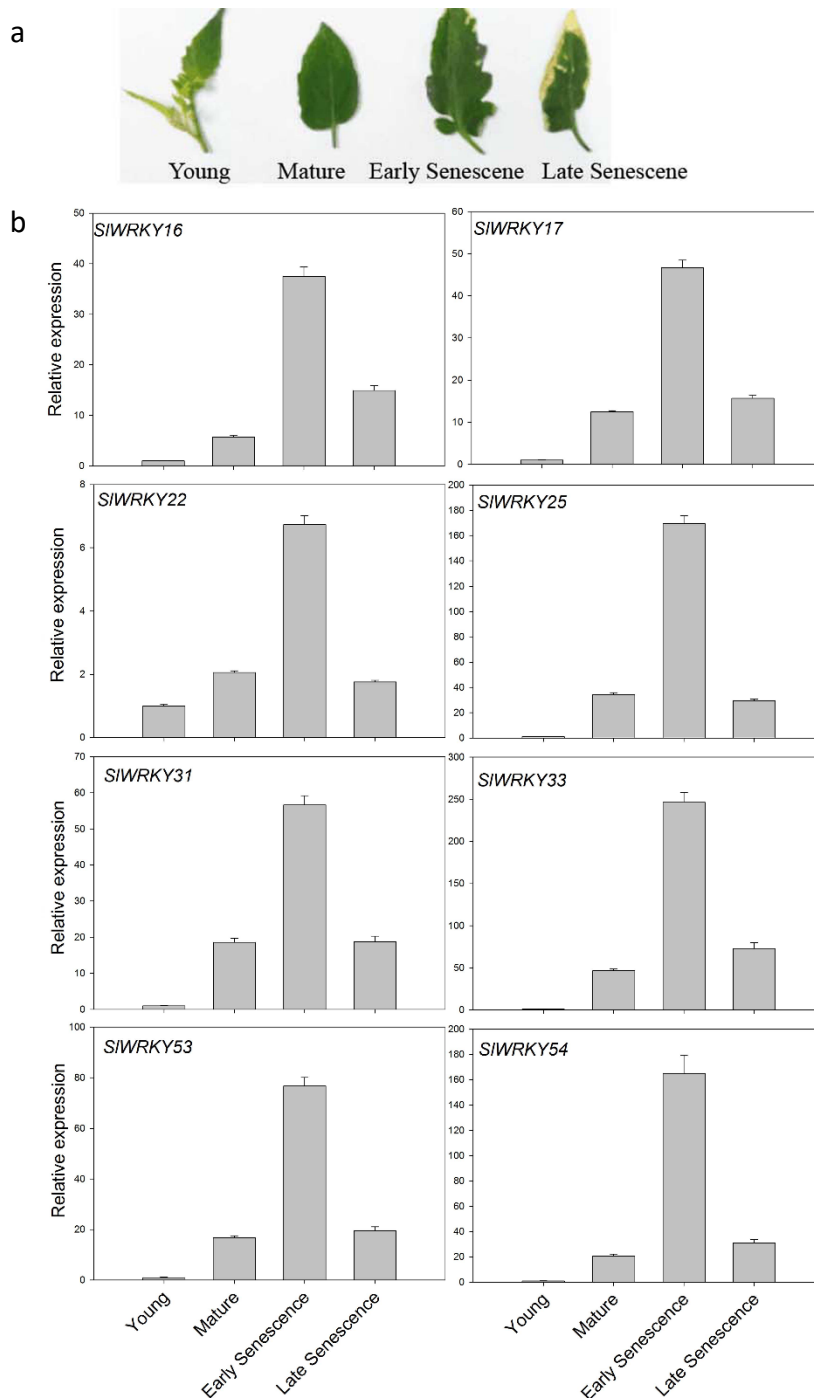

**Supplementary Figure 3.** Transcription profiling of the 8 *SIER-WRKY* genes during tomato leaf development. (a) Leaf samples were collected from young, mature, early senescent and late senescent leaves. (b) The transcription profiling of the 8 *SIER-WRKY* genes at these leaf developmental stages were as described in Supplementary Fig. S1a.

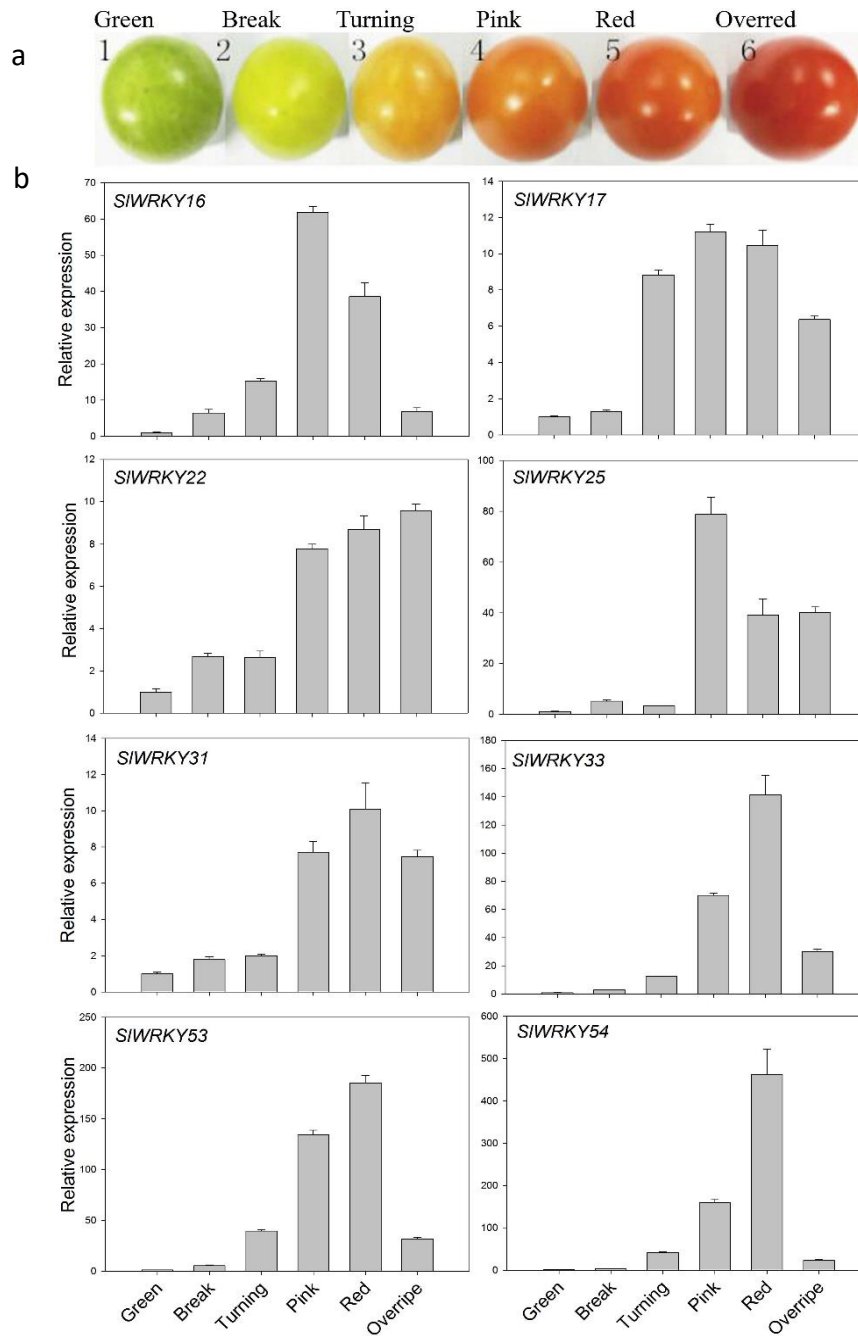

**Supplementary Figure 4.** Transcription profiling of the 8 *SIER-WRKY* genes in the tomato fruit ripening in plants. (a) Fruit pericarp samples were collected at green mature, breaking, turning, pink red and overripe stages during the fruit ripening in plants. (b) The transcription profiling of the 8 *SIER-WRKY* genes at these stages were as described in Supplementary Fig. S1a.

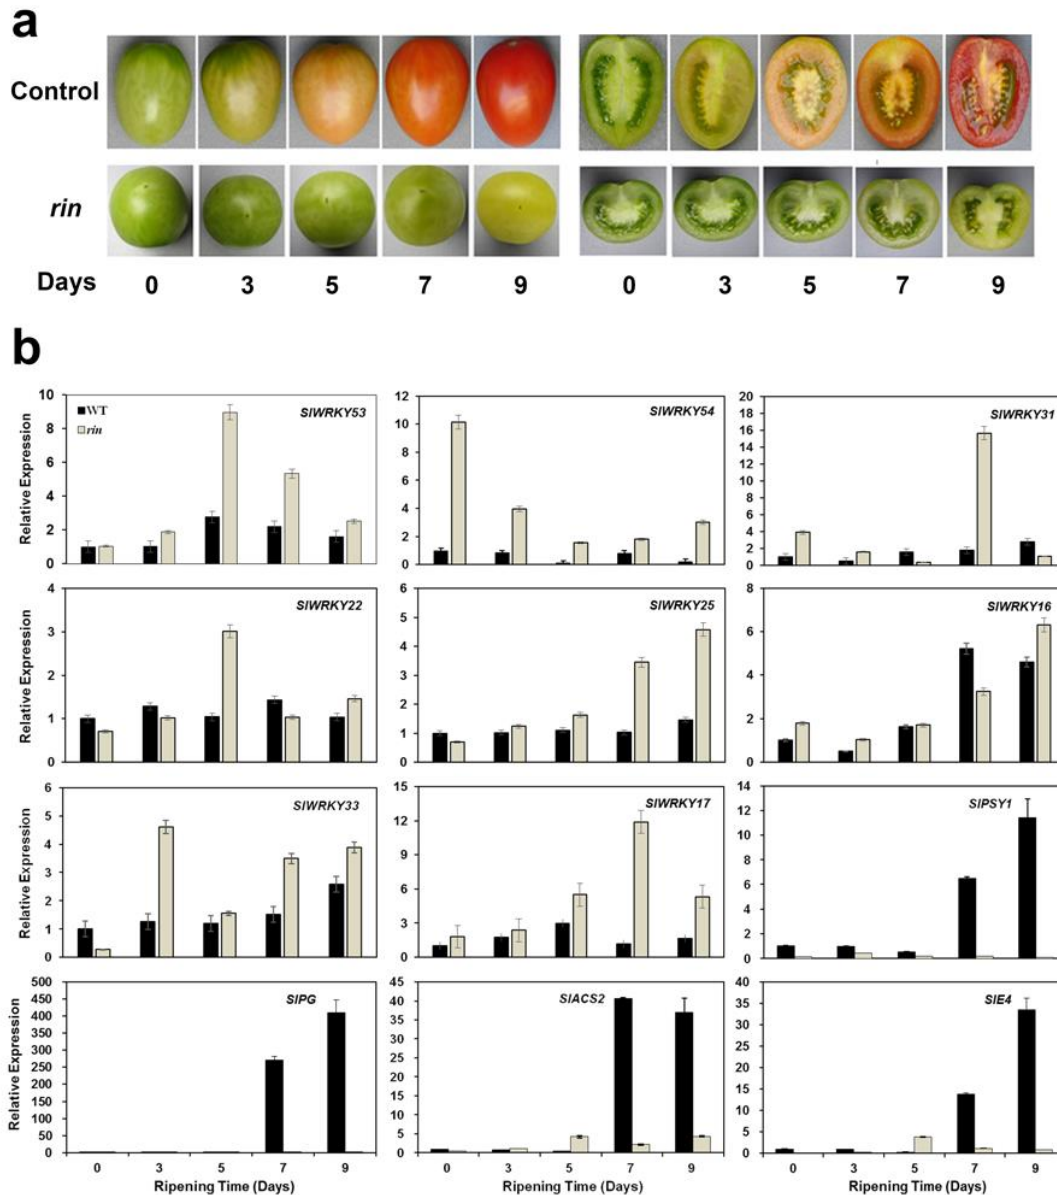

**Supplementary Figure 5.** Transcription profiling of the 8 *SIER-WRKY* genes and 4 fruit ripening related genes in wild type (WT) and *rin* mutant tomato fruit. The ripening inhibitor (*rin*) mutant (NIL LA3754) was a gift from Tomato Genetics Resource Center (USA). The *rin* mutant is a single gene mutation, fruit attain full size and produce viable seed; however, they are arrested in the fruit ripening<sup>1</sup>. The 8 ethylene-responsive *SIWRKY* (*SIER-WRKY*) genes were identified based on the gene transcription profiles in Fig. 4 and Supplementary Fig. S1a; the 4 typical fruit ripening related genes were selected according to Martel et al. (2011)<sup>2</sup>. (a) Fruit pericarp samples were collected at green mature, breaking, turning, pink red and overripe stages during the fruit ripening in plants. (b) The transcription profiling of the 8 *SIER-WRKY* genes and 4 fruit ripening related genes at these stages.

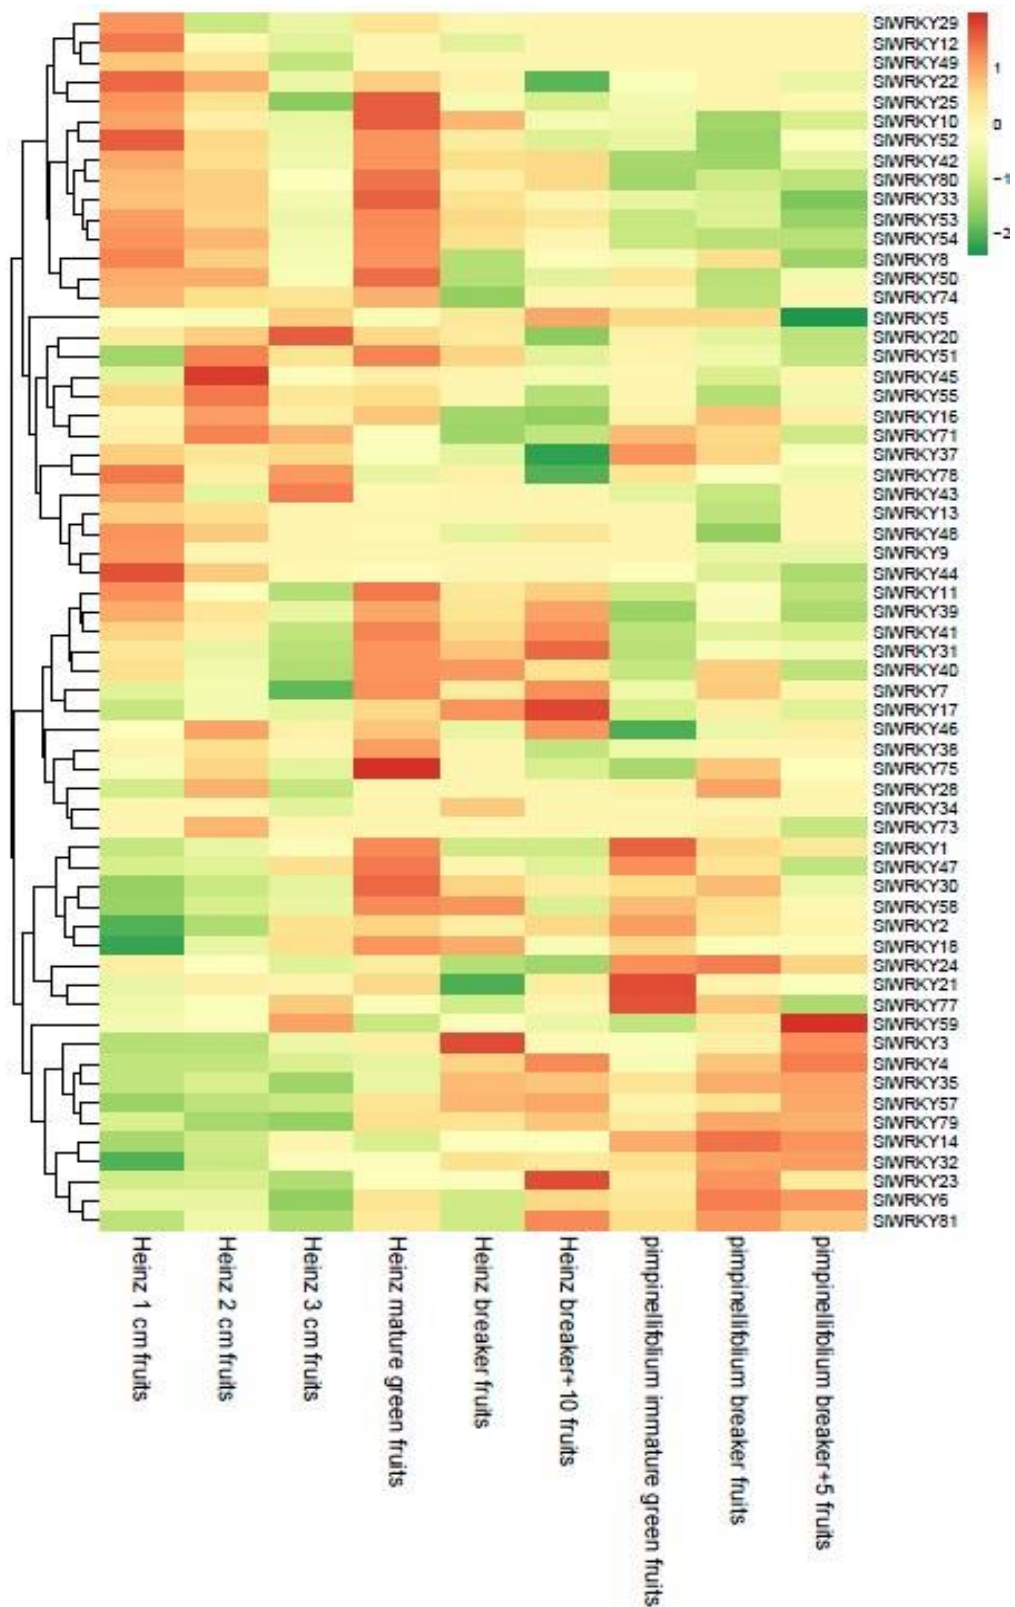

**Supplementary Figure 6.** Transcription profiling of the 81 *SlWRKY* genes of tomato fruit. The gene expression of fruit in different developmental process were obtained from the RNA-seq data at <http://ted.bti.cornell.edu/cgi-bin/TFGD/digital/home.cgi>.

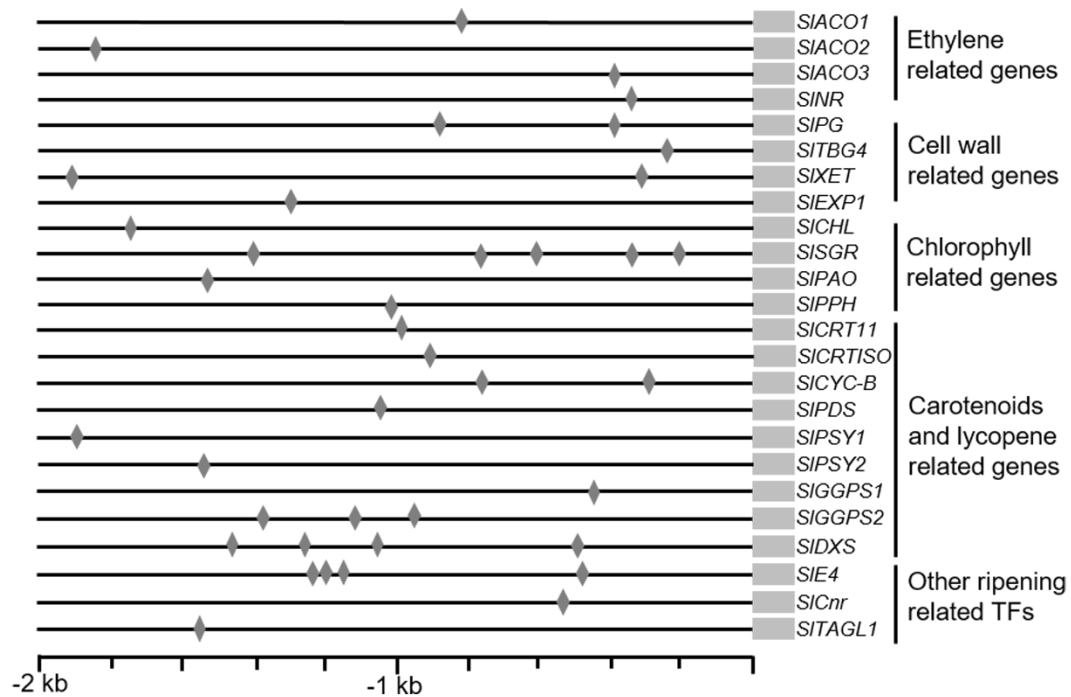

**Supplementary Figure 7.** The WRKY-binding sites (known as W-box) promoter regions of tomato fruit ripening process related genes and TFs. In addition to the selected 9 ripening related genes, W-box binding sites in promoter region of other genes that involved in ethylene, cell wall, chlorophyll, carotenoids and lycopene metabolisms, as well as several ripening regulatory TFs were predicted. It suggests that SIWRKYs may be involved in regulation of fruit ripening. The conserved cis-regulatory elements were predicted at <http://bioinformatics.psb.ugent.be/webtools/plantcare/html/>.



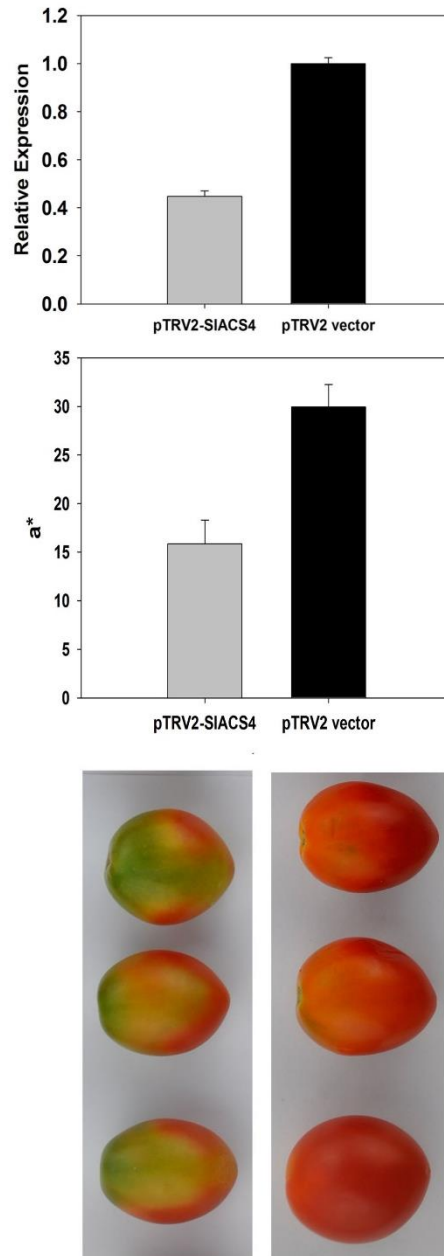

**Supplementary Figure 8.** VIGS based transient gene silencing of an ethylene biosynthesis gene, *SIACS4* as a marker. Transcription profiling of the 8 *SIER-WRKY* genes in the tomato fruit ripening in plants. The efficiency of the silencing was first confirmed by evaluation of silencing, using the same approach. The relative expression of the *SIACS4* gene, the red color a\* values and the appearance of the tomato fruits at 14 days after infiltration were shown in a same column.

**Table S1.** Correspondence between the unified nomenclature of the SIWRKY gene family and their Solyc identifiers. The relevance of other names as well as the function proposed in the literature are also listed.

| New Names <sup>a</sup> | Solyc Identifier   | Other Names | Reported function   | References   |
|------------------------|--------------------|-------------|---------------------|--------------|
| SIWRKY4                | Solyc05g012770.2.1 | SpWRKY2     | Pathogen resistance | <sup>3</sup> |
| SIWRKY31               | Solyc06g066370     | SIDW1       | Disease resistance  | <sup>4</sup> |
| SIWRKY40               | Solyc06g068460.2   | SIWRKY1     | Disease resistance  | <sup>5</sup> |
| SIWRKY73               | Solyc03g113120.2   | SIWRKY72a   | Immune responses    | <sup>6</sup> |
| SIWRKY74               | Solyc06g070990.2   | SIWRKY72b   | Immune responses    | <sup>6</sup> |
| SIWRKY80               | Solyc03g095770.2   | SIWRKY70    | Insect infestation  | <sup>7</sup> |

<sup>a</sup> The new names are issued according to Huang et al.<sup>8</sup>, and the Solyc chromosome identifier issued by ITAG 2.40 reference annotation <sup>9</sup>.

**Table S2. The sequences and main functions of WRKY-TFs that have been reported**

| Gene Name       | Species                    | References | Gene Bank      | Function                     |
|-----------------|----------------------------|------------|----------------|------------------------------|
| <i>AtWRKY6</i>  | <i>Arabidopsis</i>         | 10,11      | NP_564792.1    | Senescence                   |
| <i>AtWRKY8</i>  | <i>Arabidopsis</i>         | 12         | NP_199447.1    | Induced by ACC               |
| <i>AtWRKY18</i> | <i>Arabidopsis</i>         | 13         | NP_567882.1    | Senescence                   |
| <i>AtWRKY22</i> | <i>Arabidopsis</i>         | 14         | NP_192034.1    | Senescence                   |
| <i>AtWRKY30</i> | <i>Arabidopsis</i>         | 15         | NP_568439.1    | Senescence                   |
| <i>AtWRKY33</i> | <i>Arabidopsis</i>         | 16         | NP_181381.2    | Combine with promoter of ACS |
| <i>AtWRKY53</i> | <i>Arabidopsis</i>         | 17-19      | NP_194112.1    | Senescence                   |
| <i>AtWRKY54</i> | <i>Arabidopsis</i>         | 15         | NP_181607.1    | Senescence                   |
| <i>AtWRKY57</i> | <i>Arabidopsis</i>         | 20         | NP_177090.1    | Senescence                   |
| <i>AtWRKY70</i> | <i>Arabidopsis</i>         | 15,21      | NP_191199.1    | Senescence                   |
| <i>AtWRKY75</i> | <i>Arabidopsis</i>         | 22         | NP_196812.1    | Senescence                   |
| <i>OsWRKY23</i> | <i>Oryza sativa</i>        | 23         | NP_001044163.1 | Senescence                   |
| <i>OsWRKY71</i> | <i>Oryza sativa</i>        | 24         | NP_001046094.1 | Induced by ACC               |
| <i>OsWRKY80</i> | <i>Oryza sativa</i>        | 25         | NP_001063497.1 | Senescence                   |
| <i>GbWRKY1</i>  | <i>Gossypium barbadens</i> | 26         | AFH35047.1     | Induced by ACC               |
| <i>GhWRKY40</i> | <i>Gossypium hirsutum</i>  | 27         | AGX24945.1     | Response of                  |

---

|                 |                         |    |            |                                |
|-----------------|-------------------------|----|------------|--------------------------------|
|                 |                         |    |            | ethylene signal                |
| <i>BnWRKY1</i>  | <i>Brassica napus</i> L | 28 | ACI14383.1 | Response of<br>ethylene signal |
| <i>BnWRKY28</i> | <i>Brassica napus</i> L | 28 | ACI14393.1 | Response of<br>ethylene signal |
| <i>BnWRKY32</i> | <i>Brassica napus</i> L | 28 | ACI14396.1 | Response of<br>ethylene signal |
| <i>BnWRKY33</i> | <i>Brassica napus</i> L | 28 | ACI14397.1 | Response of<br>ethylene signal |
| <i>BnWRKY40</i> | <i>Brassica napus</i> L | 28 | ACI14400.1 | Response of<br>ethylene signal |
| <i>BnWRKY45</i> | <i>Brassica napus</i> L | 28 | ACH99806.1 | Response of<br>ethylene signal |
| <i>BnWRKY69</i> | <i>Brassica napus</i> L | 28 | ACI14405.1 | Response of<br>ethylene signal |
| <i>BnWRKY70</i> | <i>Brassica napus</i> L | 28 | ACI14407.1 | Response of<br>ethylene signal |
| <i>BnWRKY75</i> | <i>Brassica napus</i> L | 28 | ACI14409.1 | Response of<br>ethylene signal |

---

**Table S3. The primers of *SIWRKYs* and fruit ripening related genes for Real-time PCR**

| Gene Name       | Gene ID            | Primer (5' -3' )          | Length | Note |
|-----------------|--------------------|---------------------------|--------|------|
| <i>SIWRKY2</i>  | Solyc07g066220.2.1 | ACCTACGAAGGGAAGCACA       | 176bp  | 1    |
|                 |                    | CGATTTGACAGGCAACCTTC      |        |      |
| <i>SIWRKY6</i>  | Solyc02g080890.2.1 | TCAACCAAGCAAATCCTC        | 179bp  |      |
|                 |                    | TGATGGGTGGTGATGATG        |        |      |
| <i>SIWRKY15</i> | Solyc10g005680.1.1 | GAAGAACAGCAGGCGTTAC       | 117bp  |      |
|                 |                    | AGTTGAATCCGGTCATAGA       |        |      |
| <i>SIWRKY16</i> | Solyc02g032950.2.1 | TGG CAT CGA CTA CAT CAG   | 159bp  |      |
|                 |                    | TTA CAG TGG GAA ACG GAG   |        |      |
| <i>SIWRKY17</i> | Solyc07g051840.2.1 | ACAACATCCTAGCAAATC C      | 178bp  |      |
|                 |                    | TTCACCGTGTCAGCTACA        |        |      |
| <i>SIWRKY22</i> | Solyc01g095100.2.1 | GAG AAG CAA GAA AGC AGC A | 169bp  |      |
|                 |                    | TAT CGG AAA AGC AAT CTC C |        |      |
| <i>SIWRKY23</i> | Solyc01g079260.2.1 | TGGAGATGCTGATGGGGAAG      | 118bp  | 1    |
|                 |                    | AAACGCAAATCTCGGCTCTT      |        |      |
| <i>SIWRKY25</i> | Solyc10g011910.2.1 | TAAAGGTCCCCATACCCAAG      | 183bp  | 1    |
|                 |                    | GTTTTTTGGCGGCTGATTC       |        |      |
| <i>SIWRKY29</i> | Solyc08g081610.2.1 | TTCTCCAGAAACACTTATGATCG   | 144bp  |      |
|                 |                    | AGACCAGCAAAGAAATCTCCA     |        |      |
| <i>SIWRKY31</i> | Solyc06g066370.2.1 | ACAACCTATGAAGGGAAGCACA    | 175bp  | 1    |
|                 |                    | AGGGTGCTCCCATTTTCAGAC     |        |      |

|                 |                    |                                                  |       |
|-----------------|--------------------|--------------------------------------------------|-------|
| <i>SIWRKY33</i> | Solyc09g014990.2.1 | CGGTTAGGAAGCATGTGGAA<br>ATCTGGAGGGTGATTGGTGG     | 265bp |
| <i>SIWRKY39</i> | Solyc03g116890.2.1 | GCGGTAATGCCAAGACAAAC<br>TCAGTTCCTGGTGATTACGC     | 134bp |
| <i>SIWRKY40</i> | Solyc06g068460.2.1 | AGGACCAACCATTACTCTCG<br>CTGCTGGACTTTTGTTTACC     | 298bp |
| <i>SIWRKY45</i> | Solyc08g067360.2.1 | GCCCAGTCAAGAAGAAGGTA<br>GAAAGTAGGGCTGCTGGTTA     | 233bp |
| <i>SIWRKY46</i> | Solyc08g067340.2.1 | CCAACCACCTCAAGCTGAA<br>AAGACGCCATTTGTTCTGACT     | 131bp |
| <i>SIWRKY52</i> | Solyc03g007380.1.1 | GGTGCTAAACATCCGAGAG<br>CTGACACTAGCACCACCAC       | 158bp |
| <i>SIWRKY53</i> | Solyc08g008280.2.1 | CACATACCGAGGCTCCCATAA<br>CCTGTTGGATAAACGGCTTGG   | 105bp |
| <i>SIWRKY54</i> | Solyc08g082110.2.1 | CAACAAAGCAAGTGCAGAGG<br>TGGTTGTGTAGCAGCAGCA      | 110bp |
| <i>SIWRKY56</i> | Solyc08g081630.1.1 | ATTCATACAAGGAGCACAG<br>CATTAGCTTCTACAAGGGT       | 220bp |
| <i>SIWRKY71</i> | Solyc02g071130.2.1 | GTAGCGTCGCAAGGATGTTG<br>TGCTCAAAGCCTCATGTTCT     | 271bp |
| <i>SIWRKY80</i> | Solyc03g095770.2.1 | AAGAAGGAGAAGCAAGACCGTA<br>TCTTGATCGTACTTGTGGGTGC | 179bp |

|                 |                    |                                                      |       |   |
|-----------------|--------------------|------------------------------------------------------|-------|---|
| <i>SIWRKY81</i> | Solyc09g015770.2.1 | CTCAGATTTGGTGGATGATGGT<br>AAATCTTTGTGGGTTGTCTTGG     | 163bp | 1 |
| <i>SISGR</i>    | Solyc08g080090.2.1 | AAAATGGGACCATCCAACAA<br>GCTGCTTCCACAAACCCTAT         | 137bp |   |
| <i>SIPPH</i>    | Solyc01g088090.2.1 | CCCATGATGAAGTCCCAGAG<br>GGGAGAGGCTTCCATGTTT          | 221bp |   |
| <i>SIPAO</i>    | Solyc11g066440.1.1 | TGGATTAGCATAACATTCTACACGAA<br>TTGTGTTTTGTGCTGTTTCTGA | 158bp |   |
| <i>SIPSY1</i>   | Solyc03g031860.2.1 | CAAATGGGACAAGTTTCATGGA<br>TTCCTATGCCTCGATGAATCAA     | 70bp  | 3 |
| <i>SIPDS</i>    | Solyc03g123760.2.1 | AAGGCGCTGTCTTATCAGGAAA<br>TAAACTACGCTTGCTCCGACA      | 106bp | 3 |
| <i>SIPG</i>     | Solyc10g080210.1.1 | TATTACTTGTGGTCCAGG<br>ATCCTAACTCCATTTTCG             | 126bp |   |
| <i>SIACO1</i>   | Solyc07g049530.2.1 | CACTAACGGGAAGTACAAGA<br>ACCATACATAAGAAGAGCAA         | 269bp | 2 |
| <i>SIACO2</i>   | Solyc12g005940.1.1 | GCATCCTTCTACAATCCAGGA<br>CATGTAGTAGGGACGCACA         | 332bp | 2 |
| <i>SIACO3</i>   | Solyc07g049550.2.1 | GAGCGTGATGCACAGAGTGA<br>CAATCACACACACATACACCA        | 349bp | 2 |
| <i>SIACS1</i>   | Solyc08g081540.2.1 | CGGGCTAGTTTCAACTCAGA<br>CAACAACAACAAATCTAAGCCA       | 566bp | 2 |

|                                |                    |                      |       |   |
|--------------------------------|--------------------|----------------------|-------|---|
| <i>SIACS2</i>                  | Solyc01g095080.2.1 | AAGCGCGATGAGGTTAGGTA | 119bp | 4 |
|                                |                    | AAAGTGGACGCAAATCCATC |       |   |
| <i>SIE4</i>                    | Solyc03g111720.2.1 | GACCACTCTAAATCGCCAGG | 53bp  | 4 |
|                                |                    | TTCCTGAGCGGTATTGCTTT |       |   |
| <i>EF-1<math>\alpha</math></i> | Solyc06g005060.2.1 | AGATGGTCAGACCCGTGAAC | 104bp | 3 |
|                                |                    | TGGAGTACTTGGGGGTGGTA |       |   |

---

Note: 1 The primer quoted from the <sup>8</sup>

2 The primer quoted from the <sup>29</sup>

3 The primer quoted from the <sup>30</sup>

4 The primer quoted from the <sup>2</sup>



**Table S4. The primers used for construction pH7WGY2-SIWRKYx vector**

| Name of Genes                | Primers (5' -3' )                            |
|------------------------------|----------------------------------------------|
| <i>SIWRKY16</i> -pH7WGY2-For | TTACGAATTTTCGACCTGCAGatggataaaggatggggacttac |
| <i>SIWRKY16</i> -pH7WGY2-Rev | CAGTTGGAATTCTAGActactgttctttccaggacc         |
| <i>SIWRKY17</i> -pH7WGY2-For | TTACGAATTTTCGACCTGCAGatggccaaaggaagtggac     |
| <i>SIWRKY17</i> -pH7WGY2-Rev | CAGTTGGAATTCTAGAgtttgctggaaaactcga           |
| <i>SIWRKY22</i> -pH7WGY2-For | TTACGAATTTTCGACCTGCAGatggaagaggattgggatct    |
| <i>SIWRKY22</i> -pH7WGY2-Rev | CAGTTGGAATTCTAGAaacgccgcctgcgg               |
| <i>SIWRKY25</i> -pH7WGY2-For | TTACGAATTTTCGACCTGCAGatggaaagctacaaagacatta  |
| <i>SIWRKY25</i> -pH7WGY2-Rev | CAGTTGGAATTCTAGAacgaccgcctgccgc              |
| <i>SIWRKY31</i> -pH7WGY2-For | TTACGAATTTTCGACCTGCAGatggctgcttcaagttctc     |
| <i>SIWRKY31</i> -pH7WGY2-Rev | CAGTTGGAATTCTAGAgcaaagcaatgactcc             |
| <i>SIWRKY33</i> -pH7WGY2-For | TTACGAATTTTCGACCTGCAGatggcttctcaggtggaat     |
| <i>SIWRKY33</i> -pH7WGY2-Rev | CAGTTGGAATTCTAGAgttaaggaaagagctgaag          |
| <i>SIWRKY53</i> -pH7WGY2-For | TTACGAATTTTCGACCTGCAGatggattgtgcatcaaactg    |
| <i>SIWRKY53</i> -pH7WGY2-Rev | CAGTTGGAATTCTAGAtgagaaaaattggggtt            |
| <i>SIWRKY54</i> -pH7WGY2-For | TTACGAATTTTCGACCTGCAGatggattgtggattcaattatga |
| <i>SIWRKY54</i> -pH7WGY2-Rev | CAGTTGGAATTCTAGAtctgaaaaaatcagagaatt         |

Note : The letters of lowercases are linearized homologous sequences ends of pH7WGY2 vectors.

**Table S5. The primers used for construction pAbAi-SIWRKYx vector for Y1H assay**

| Name of genes              | Primers(5' -3' )                      | Enzyme sites    |
|----------------------------|---------------------------------------|-----------------|
| <i>SISGR</i> -p-pAbAi-For  | CGGggtaccGTTTTCAACCTCTTAATTTTGGCAG    | <i>Kpn</i> I    |
| <i>SISGR</i> -p-pAbAi-Rev  | ACGCgtcgacAAAACCTCCTTGAATCTTGGAGTTCC  | <i>Sal</i> I    |
| <i>SIPPH</i> -p-pAbAi-For  | CGGggtaccATCATCCCAAGAAGCCCCTTTTGAT    | <i>Kpn</i> I    |
| <i>SIPPH</i> -p-pAbAi-Rev  | ACGCgtcgacCATCCCAGAGTCAGCTTTCTAAAATCT | <i>Sal</i> I    |
| <i>SIPAO</i> -p-pAbAi-For  | CCCaagcttTGTGACCTTGAAGTGTATGTAG       | <i>Hind</i> III |
| <i>SIPAO</i> -p-pAbAi-Rev  | CCctcgagTATTGAGTTAATCAATGTTTTGTGT     | <i>Xho</i> I    |
| <i>SIPSY1</i> -p-pAbAi-For | CGGggtaccGGCTAAATCGAAAATTGAATCGTT     | <i>Kpn</i> I    |
| <i>SIPSY1</i> -p-pAbAi-Rev | ACGCgtcgacTCTGAGCAAGAAAACCTTGTTGT     | <i>Sal</i> I    |
| <i>SIPDS</i> -p-pAbAi-For  | CGGggtaccCGTCTAATATCTGGTGTCTTCTC      | <i>Kpn</i> I    |
| <i>SIPDS</i> -p-pAbAi-Rev  | ACGCgtcgacCAGTAAACCTGCCATAAGGATAT     | <i>Sal</i> I    |
| <i>SIACO1</i> -p-pAbAi-For | CCCaagcttTTTGGTTAGAGGGAGAATTTGTG      | <i>Hind</i> III |
| <i>SIACO1</i> -p-pAbAi-Rev | CCctcgagTGATGTACAAATAATGAGGCTTTGA     | <i>Xho</i> I    |
| <i>SIACO3</i> -p-pAbAi-For | CCCaagcttTCAAGTCAACGGATAGAAATTTCA     | <i>Hind</i> III |
| <i>SIACO1</i> -p-pAbAi-Rev | CCGctcgagGAAAAGAGTGATTCTTTGAAAGG      | <i>Xho</i> I    |

**Table S6. The primers used for construction pGADT7-AD-WRKYx vector**

| Name of Genes            | Primers (5' -3' )                     | Enzyme sites  |
|--------------------------|---------------------------------------|---------------|
| <i>SIWRKY16</i> -AD-For  | CGCggatccATATGGATAAAGGATGGGGACTT      | <i>BamH I</i> |
| <i>SIWRKY16</i> -AD-Rev  | CgagctcGCTACTGTTCTTTTCCAGGACCA        | <i>Sac I</i>  |
| <i>SIWRKY17</i> -AD-For  | CGCggatccATGGCCAAAGGAAGTGGACTCT       | <i>BamH I</i> |
| <i>SIWRKY17</i> -AD-Rev  | CgagctcTCAGTTTGCTGGAAAACCTCGAAT       | <i>Sac I</i>  |
| <i>SIWRKY22</i> -AD- For | CGCggatccATATGGAAGAGGATTGGGATCTAC     | <i>BamH I</i> |
| <i>SIWRKY22</i> -AD-Rev  | CCGCCGctcgagCTCAAACGCCGCTGCGG         | <i>Xho I</i>  |
| <i>SIWRKY25</i> -AD-For  | GGAATTCcatatgATGGAAGAAGATTGGGATCT     | <i>Nde I</i>  |
| <i>SIWRKY25</i> -AD-Rev  | CCGCCGctcgagCACTACGGCGGCAGGCGGTCGTTGA | <i>Xho I</i>  |
| <i>SIWRKY31</i> -AD-For  | CGCggatccATGGCTGCTTCAAGTTTCTCT        | <i>BamH I</i> |
| <i>SIWRKY31</i> -AD-Rev  | CgagctcTCAGCAAAGCAATGACTCCATA         | <i>Sac I</i>  |
| <i>SIWRKY33</i> -AD-For  | GGAATTCcatatgATGGCTTCTTCAGGTGGAAAT    | <i>Nde I</i>  |
| <i>SIWRKY33</i> -AD-Rev  | CCGctcgagCTCAGTTAAGGAAAGAGCTGAAG      | <i>Xho I</i>  |
| <i>SIWRKY53</i> -AD-For  | GGAATTCcatatgATGGATTGTGCATCAAACCTGG   | <i>Nde I</i>  |
| <i>SIWRKY53</i> -AD-Rev  | CCGctcgagGTCATGAGAAAAATTTGGGGTT       | <i>Xho I</i>  |
| <i>SIWRKY54</i> -AD-For  | GGAATTCcatatgATGGATTGTGGATTCAATTATG   | <i>Nde I</i>  |
| <i>SIWRKY54</i> -AD-Rev  | CCGctcgagCTTATCTGAAAAAATCAGAGAAAT     | <i>Xho I</i>  |

**Table S7. The primers used for construction *pGreenII 0800-LUC* vector**

| Name of Genes          | Primers (5' -3' )                              |
|------------------------|------------------------------------------------|
| <i>SIACO1</i> -LUC-For | gtcgacggtatcgataagcttGTAGACTAATGTCTGACGTTTAAC  |
| <i>SIACO1</i> -LUC-Rev | cgctctagaactagtgatccTGATGTACAAATAATGAGGCTTTGA  |
| <i>SIACO2</i> -LUC-For | gtcgacggtatcgataagcttCTTTTCACACTTGTTTGAAGCCAT  |
| <i>SIACO2</i> -LUC-Rev | cgctctagaactagtgatccAAGATTGAGGCTTTGTTTGGGTATT  |
| <i>SIACO3</i> -LUC-For | gtcgacggtatcgataagcttATGATACGTCGAAAATTCAAACG   |
| <i>SIACO3</i> -LUC-Rev | cgctctagaactagtgatccGAAAAGAGTGATTCTTTGAAAGG    |
| <i>SIPAO</i> -LUC-For  | gtcgacggtatcgataagcttTGTGACCTTTGAACTGTTATGTAG  |
| <i>SIPAO</i> -LUC-Rev  | cgctctagaactagtgatccTATTGAGTTAATCAATGTTTTGTGT  |
| <i>SIPDS</i> -LUC-For  | gtcgacggtatcgataagcttCGTCTAATATCTGGTGTCTCTCTC  |
| <i>SIPDS</i> -LUC-Rev  | cgctctagaactagtgatccGGTTCTGCACAATTAAGCAAATA    |
| <i>SIPG</i> -LUC-For   | gtcgacggtatcgataagcttTAAGACAAAGGCCTTAAAGGACA   |
| <i>SIPG</i> -LUC-Rev   | cgctctagaactagtgatccCATGAGCAAATTCTTGTTCAAGAA   |
| <i>SIPPH</i> -LUC-For  | gtcgacggtatcgataagcttTCATCCCAAGAAGCCCCTTTTG    |
| <i>SIPPH</i> -LUC-Rev  | cgctctagaactagtgatccATCCCAGAGTCAGCTTTCTAAAATCT |
| <i>SIPSY1</i> -LUC-For | gtcgacggtatcgataagcttGGCTAAATCGAAAATTGAATCGTT  |
| <i>SIPSY1</i> -LUC-Rev | cgctctagaactagtgatccTCTGAGCAAGAAAACCTTGTT      |
| <i>SISGR</i> -LUC-For  | gtcgacggtatcgataagcttGTTTTCAACCTCTTAATTTTGGCAG |
| <i>SISGR</i> -LUC-Rev  | cgctctagaactagtgatccACTCCTTGAATCTTGGAGTTCC     |

Note: The letters of lowercases are linearized homologous sequences ends of *pGreenII 0800-LUC* vectors.

**Table S8. The primer used for construction *pCambia35tlegyfps* vector**

| Name of Genes                 | Primers (5' -3' )                            |
|-------------------------------|----------------------------------------------|
| <i>SIWRKY16</i> -pCambia-For  | ttacgaatttcgacctgcagATGGATAAAGGATGGGGACTTA   |
| <i>SIWRKY16</i> - pCambia-Rev | cagttggaattctagaCTACTGTTCTTTCCAGGACC         |
| <i>SIWRKY17</i> - pCambia-For | ttacgaatttcgacctgcagATGGCCAAAGGAAGTGGAC      |
| <i>SIWRKY17</i> - pCambia-Rev | cagttggaattctagaTCAGTTTGCTGGAAAACCTCGA       |
| <i>SIWRKY22</i> - pCambia-For | ttacgaatttcgacctgcagATGGAAGAGGATTGGGATCT     |
| <i>SIWRKY22</i> - pCambia-Rev | cagttggaattctaga TCAAACGCCGCCTGCCG           |
| <i>SIWRKY25</i> - pCambia-For | ttacgaatttcgacctgcagATGGAAGAAGATTGGGATCTAA   |
| <i>SIWRKY25</i> - pCambia-Rev | cagttggaattctagaTCAACGACCGCCTGCCG            |
| <i>SIWRKY31</i> - pCambia-For | ttacgaatttcgacctgcagATGGCTGCTCAAGTTTCTC      |
| <i>SIWRKY31</i> - pCambia-Rev | cagttggaattctagaTCAGCAAAGCAATGACTCC          |
| <i>SIWRKY33</i> - pCambia-For | ttacgaatttcgacctgcagATGGCTTCTTCAGGTGGAAAT    |
| <i>SIWRKY33</i> - pCambia-Rev | cagttggaattctaga TCAGTTAAGGAAAGAGCTGAAG      |
| <i>SIWRKY53</i> - pCambia-For | ttacgaatttcgacctgcagATGGATTGTGCATCAAACCTG    |
| <i>SIWRKY53</i> - pCambia-Rev | cagttggaattctagaTCATGAGAAAAATTTGGGGTT        |
| <i>SIWRKY54</i> - pCambia-For | ttacgaatttcgacctgcag ATGGATTGTGGATTCAATTATGA |
| <i>SIWRKY54</i> - pCambia-Rev | cagttggaattctaga TTATCTGAAAAAATCAGAGAAATT    |

Note: The letters of lowercases are linearized homologous sequences ends of *pCambia35tlegyfps* vectors.

**Table S9. The primers used for construction pGBKT7-DBD-WRKYx vector**

| Name of Genes            | Primers (5' -3' )                             | Enzyme sites   |
|--------------------------|-----------------------------------------------|----------------|
| <i>SIWRKY16</i> -DBD-For | CATGccatggAGATGGATAAAGGATGGGGACTT             | <i>Nco</i> I   |
| <i>SIWRKY16</i> -DBD-Rev | ACGCgtcgcacGCTACTGTTCTTTTCCAGGACCA            | <i>Sal</i> I   |
| <i>SIWRKY17</i> -DBD-For | CGCggatccGTATGGCCAAAGGAAGTGGACTCT             | <i>Bam</i> H I |
| <i>SIWRKY17</i> -DBD-Rev | ACGCgtcgcacGTCAGTTTGCTGGAAAACCTCGAAT          | <i>Sal</i> I   |
| <i>SIRIN</i> -DBD-For    | tcagaggaggacctgcatatgATGGGTAGAGGGAAAGTAGAAT   | Note           |
| <i>SIRIN</i> -DBD-Rev    | tcgacggatccccggaattcAAGCATCCATCCAGGTACA       | Note           |
| <i>SIERF7</i> -DBD-For   | tcagaggaggacctgcatatgATGGCTAGGGCACAACAA       | Note           |
| <i>SIERF7</i> -DBD-Rev   | tcgacggatccccggaattcTCACTGGATTTGGTGAGAAGG     | Note           |
| <i>SIERF2b</i> -DBD-For  | tcagaggaggacctgcatatgATGTGTGGTGGTGCAATTC      | Note           |
| <i>SIERF2b</i> -DBD-Rev  | tcgacggatccccggaattcTTAAACTACATTATAACTTGGTTGT | Note           |

Note: The letters of lowercases are linearized homologous sequences ends of BD vector

**Table S10. The primers used for construction BiFC vector**

| Name of Genes              | Primers (5' -3' )                              |
|----------------------------|------------------------------------------------|
| <i>SIWRKY16</i> - BiFC-For | tcagatctcgagctcaagcttATGGATAAAGGATGGGGACT      |
| <i>SIWRKY16</i> -BiFC-Rev  | gactctagatcaggtggatccCTGTTCTTTTCCAGGACC        |
| <i>SIWRKY17</i> -BiFC-For  | tcagatctcgagctcaagcttATGGCCAAAGGAAGTGA         |
| <i>SIWRKY17</i> -BiFC-Rev  | gactctagatcaggtggatccGTTTGCTGGAAAACCTCGAA      |
| <i>SIWRKY 33</i> -BiFC-For | tcagatctcgagctcaagcttATGGCTTCTTCAGGTGGAAAT     |
| <i>SIWRKY 33</i> -BiFC-Rev | gactctagatcaggtggatccGTTAAGGAAAGAGCTGAAGAAT    |
| <i>SIWRKY 53</i> -BiFC-For | tcagatctcgagctcaagcttATGGATTGTGCATCAAACCTGG    |
| <i>SIWRKY 53</i> -BiFC-Rev | gactctagatcaggtggatccTGAGAAAAATTTGGGGTTACCAA   |
| <i>SIWRKY 54</i> -BiFC-For | tcagatctcgagctcaagcttATGGATTGTGGATTCAATTATGAAT |
| <i>SIWRKY 54</i> -BiFC-Rev | gactctagatcaggtggatccTCTGAAAAAATCAGAGAAATTTGG  |
| <i>SIERF2b</i> -BiFC-For   | tcagatctcgagctcaagcttATGTGTGGTGGTGAATTCT       |
| <i>SIERF2</i> -BiFC-Rev    | gactctagatcaggtggatccAACTACATTATAACTTGGTTGTAC  |
| <i>SIERF7</i> -BiFC-For    | tcagatctcgagctcaagcttATGGCTAGGGCACAACAA        |
| <i>SIERF7</i> -BiFC-Rev    | gactctagatcaggtggatccCTGGATTTGGTGAGAAGGAA      |
| <i>SIRIN</i> -BiFC-For     | tcagatctcgagctcaagcttATGGGTAGAGGGAAAGTAGAA     |
| <i>SIRIN</i> -BiFC-Rev     | gactctagatcaggtggatccAAGCATCCATCCAGGTACA       |

**Table S11. The primers used for construction VIGS vector**

| Gene name                  | Primer (5'- 3')                                  |
|----------------------------|--------------------------------------------------|
| LIC- <i>SIWRKY16</i> -For  | <u>CGACGACAAGACCCT</u> GGGTTTAATCATATGATGAACCG   |
| LIC- <i>SIWRKY16</i> -Rev  | <u>GAGGAGAAGAGCCCT</u> AATTGGAATTATGAGATAGATCGT  |
| LIC - <i>SIWRKY17</i> -For | <u>CGACGACAAGACCCT</u> CATAACAACCAATTTTATCCTAAGA |
| LIC- <i>SIWRKY17</i> -Rev  | <u>GAGGAGAAGAGCCCT</u> AACATTGAATCTAGTTCCACAT    |
| LIC - <i>SIWRKY22</i> -For | <u>CGACGACAAGACCCT</u> CATGCGGTGGTCAGAGGC        |
| LIC- <i>SIWRKY22</i> -Rev  | <u>GAGGAGAAGAGCCCT</u> GGTCTTGGGCTTGAACATGTG     |
| LIC - <i>SIWRKY23</i> -For | <u>CGACGACAAGACCCT</u> ATTTTCATTGACAACAACGGTT    |
| LIC- <i>SIWRKY25</i> -Rev  | <u>GAGGAGAAGAGCCCT</u> TTTGATTGTTTGACTTTGAGCA    |
| LIC - <i>SIWRKY31</i> -For | <u>CGACGACAAGACCCT</u> TGACGACTTCTTTCACCGACCT    |
| LIC- <i>SIWRKY31</i> -Rev  | <u>GAGGAGAAGAGCCCT</u> TGTGGGCTCTTGACAATTCCA     |
| LIC - <i>SIWRKY33</i> -For | <u>CGACGACAAGACCCT</u> AACTCATTTTCTTCTTCTCAATTC  |
| LIC- <i>SIWRKY33</i> -Rev  | <u>GAGGAGAAGAGCCCT</u> TTCACTCCAGTTTTTGCTG       |
| LIC - <i>SIWRKY53</i> -For | <u>CGACGACAAGACCCT</u> TATTCTGCACCACAACCAAC      |
| LIC- <i>SIWRKY53</i> -Rev  | <u>GAGGAGAAGAGCCCT</u> TTGGATCCAGCTCCAAATG       |
| LIC - <i>SIWRKY54</i> -For | <u>CGACGACAAGACCCT</u> TGCTGCTGCTACACAACCA       |
| LIC- <i>SIWRKY54</i> -Rev  | <u>GAGGAGAAGAGCCCT</u> CTACATGTTCAAGTGGAAACTC    |
| LIC - <i>SIACS4</i> -For   | <u>CGACGACAAGACCCT</u> TCTCCACTTTCACTAACG        |
| LIC - <i>SIACS4</i> -Rev   | <u>GAGGAGAAGAGCCCT</u> GCAAATCCATCCAACAATA       |

Note: The nucleotides underlined are LIC sequences.



## References

1. Giovannoni, J. J. *et al.* Molecular genetic analysis of the ripening-inhibitor and non-ripening loci of tomato: A first step in genetic map-based cloning of fruit ripening genes. *Mol. Gen. Genet.* **248**, 195-206 (1995).
2. Martel, C., Vrebalov, J., Tafelmeyer, P. & Giovannoni, J. J. The tomato MADS-box transcription factor RIPENING INHIBITOR interacts with promoters involved in numerous ripening processes in a COLORLESS NONRIPENING-dependent manner. *Plant Physiol.* **157**, 1568-1579 (2011).
3. Li, J.-b. & Luan, Y.-s. Molecular cloning and characterization of a pathogen-induced WRKY transcription factor gene from late blight resistant tomato varieties *Solanum pimpinellifolium* L3708. *Physiol. Mol. Plant P.* **87**, 25-31 (2014).
4. Liu, B. *et al.* Tomato WRKY transcriptional factor SIDRW1 is required for disease resistance against *Botrytis cinerea* and tolerance to oxidative stress. *Plant Sci.* **227**, 145-156 (2014).
5. Molan, Y. & El-Komy, M. Expression of Sl-WRKY1 transcription factor during *B. cinerea* tomato interaction in resistant and susceptible cultivars. *International Journal of Plant Breeding and Genetics* **4**, 1-12 (2010).
6. Bhattarai, K. K., Atamian, H. S., Kaloshian, I. & Eulgem, T. WRKY72-type transcription factors contribute to basal immunity in tomato and *Arabidopsis* as well as gene-for-gene resistance mediated by the tomato R gene Mi-1. *Plant J* **63**, 229-240 (2010).
7. Atamian, H. S., Eulgem, T. & Kaloshian, I. SlWRKY70 is required for Mi-1-mediated resistance to aphids and nematodes in tomato. *Planta* **235**, 299-309 (2012).
8. Huang, S. *et al.* Genome-wide analysis of WRKY transcription factors in *Solanum lycopersicum*. *Mol. Genet. Genomics* **287**, 495-513 (2012).
9. Consortium, T. G. The tomato genome sequence provides insights into fleshy fruit evolution. *Nature* **485**, 635-641 (2012).
10. Robatzek, S. & Somssich, I. E. A new member of the *Arabidopsis* WRKY transcription factor family, AtWRKY6, is associated with both senescence - and defence - related processes. *Plant J* **28**, 123-133 (2001).
11. Robatzek, S. & Somssich, I. E. Targets of AtWRKY6 regulation during plant senescence and pathogen defense. *Genes Dev.* **16**, 1139-1149 (2002).
12. Chen, L., Zhang, L. & Yu, D. Wounding-induced WRKY8 is involved in basal defense in *Arabidopsis*. *Mol. Plant-Microbe In.* **23**, 558-565 (2010).
13. Potschin, M., Schlienger, S., Bieker, S. & Zentgraf, U. Senescence networking: WRKY18 is an upstream regulator, a downstream target gene, and a protein interaction partner of WRKY53. *J Plant Growth Regul.* **33**, 106-118 (2014).
14. Zhou, X., Jiang, Y. & Yu, D. WRKY22 transcription factor mediates dark-induced leaf senescence in *Arabidopsis*. *Mol. Cells* **31**, 303-313 (2011).
15. Besseau, S., Li, J. & Palva, E. T. WRKY54 and WRKY70 co-operate as negative regulators of leaf senescence in *Arabidopsis thaliana*. *J Exp Bot* **63**, 2667-2679, doi:10.1093/jxb/err450 (2012).
16. Li, G. *et al.* Dual-level regulation of ACC synthase activity by MPK3/MPK6 cascade and its downstream WRKY transcription factor during ethylene induction in *Arabidopsis*. *PLoS Genet.* **8** (2012).
17. Hinderhofer, K. & Zentgraf, U. Identification of a transcription factor specifically expressed at the onset of leaf senescence. *Planta* **213**, 469-473 (2001).

18. Miao, Y., Laun, T., Zimmermann, P. & Zentgraf, U. Targets of the WRKY53 transcription factor and its role during leaf senescence in Arabidopsis. *Plant Mol. Biol.* **55**, 853-867 (2004).
19. Miao, Y., Smykowski, A. & Zentgraf, U. A novel upstream regulator of WRKY53 transcription during leaf senescence in Arabidopsis thaliana. *Plant Biol.* **10**, 110-120 (2008).
20. Jiang, Y., Liang, G., Yang, S. & Yu, D. Arabidopsis WRKY57 functions as a node of convergence for jasmonic acid–and auxin-mediated signaling in jasmonic acid–induced leaf senescence. *Plant Cell* **26**, 230-245 (2014).
21. Ulker, B., Shahid Mukhtar, M. & Somssich, I. E. The WRKY70 transcription factor of Arabidopsis influences both the plant senescence and defense signaling pathways. *Planta* **226**, 125-137 (2007).
22. Li, Z., Peng, J., Wen, X. & Guo, H. Gene network analysis and functional studies of senescence-associated genes reveal novel regulators of Arabidopsis leaf senescence. *J Integr. Plant Biol.* **54**, 526-539 (2012).
23. Jing, S., Zhou, X., Song, Y. & Yu, D. Heterologous expression of OsWRKY23 gene enhances pathogen defense and dark-induced leaf senescence in Arabidopsis. *Plant Growth Regul.* **58**, 181-190 (2009).
24. Liu, X., Bai, X., Wang, X. & Chu, C. OsWRKY71, a rice transcription factor, is involved in rice defense response. *J Plant Physiol.* **164**, 969-979 (2007).
25. Ricachenevsky, F. K., Sperotto, R. A., Menguer, P. K. & Fett, J. P. Identification of Fe-excess-induced genes in rice shoots reveals a WRKY transcription factor responsive to Fe, drought and senescence. *Mol. Biol. Rep.* **37**, 3735-3745 (2010).
26. Zhang, S.-L. *et al.* GbWRKY1, a novel cotton (*Gossypium barbadense*) WRKY gene isolated from a bacteriophage full-length cDNA library, is induced by infection with *Verticillium dahliae*. (2012).
27. Wang, X. *et al.* GhWRKY40, a multiple stress-responsive cotton WRKY gene, plays an important role in the wounding response and enhances susceptibility to *Ralstonia solanacearum* infection in transgenic *Nicotiana benthamiana*. *PLoS one* **9**, e93577 (2014).
28. Yang, B., Jiang, Y., Rahman, M. H., Deyholos, M. K. & Kav, N. N. Identification and expression analysis of WRKY transcription factor genes in canola (*Brassica napus* L.) in response to fungal pathogens and hormone treatments. *BMC Plant Biol.* **9**, 68 (2009).
29. Zhang, Z., Zhang, H., Quan, R., Wang, X.-C. & Huang, R. Transcriptional regulation of the ethylene response factor LeERF2 in the expression of ethylene biosynthesis genes controls ethylene production in tomato and tobacco. *Plant Physiol.* **150**, 365-377 (2009).
30. Guo, F., Zhou, W., Zhang, J., Xu, Q. & Deng, X. Effect of the citrus lycopene  $\beta$ -cyclase transgene on carotenoid metabolism in transgenic tomato fruits. *PLoS one* **7**, e32221 (2012).
